# Supplementary material
Source: PubMed Central journal article supplement (PMC5311247)

# Supplemental Figure 2

## A

■ RNAi-vector   ■ AEG-1-RNAi  
■ AEG-1-RNAi+c-Jun(wild type)

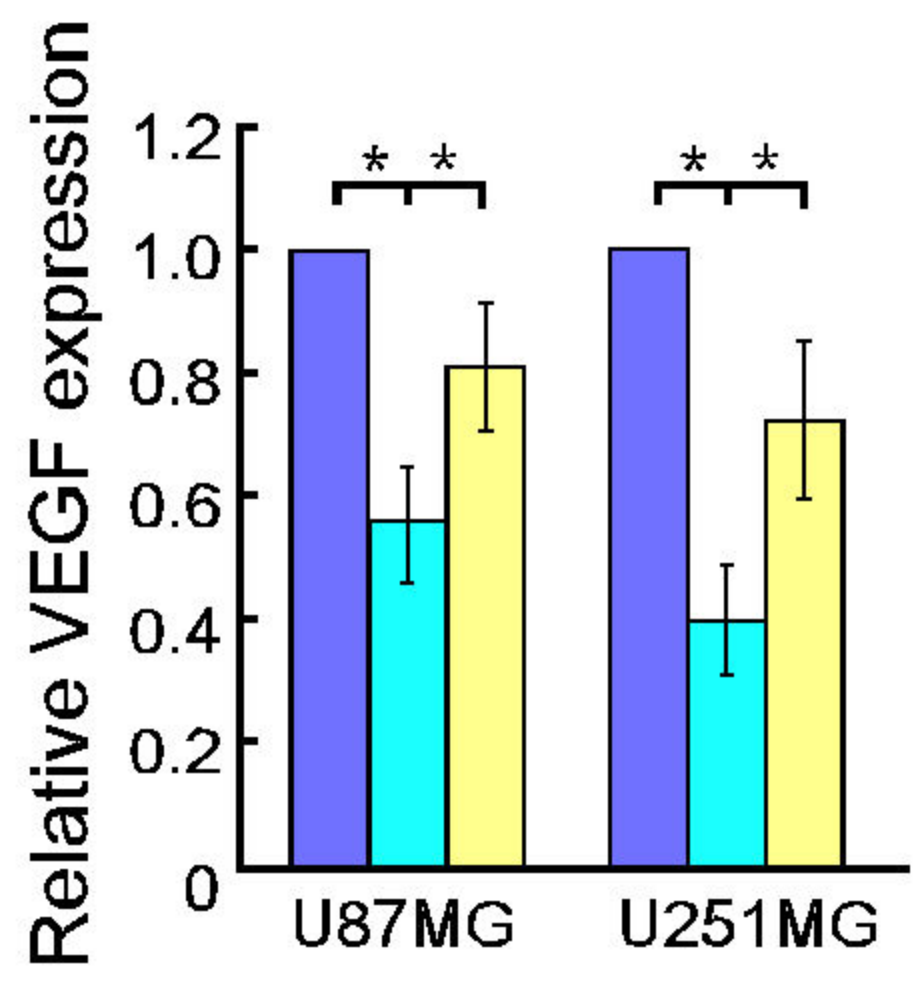

## B

■ RNAi-Vector   ■ AEG-1-RNAi#1  
■ AEG-1-RNAi+c-Jun(wild type)

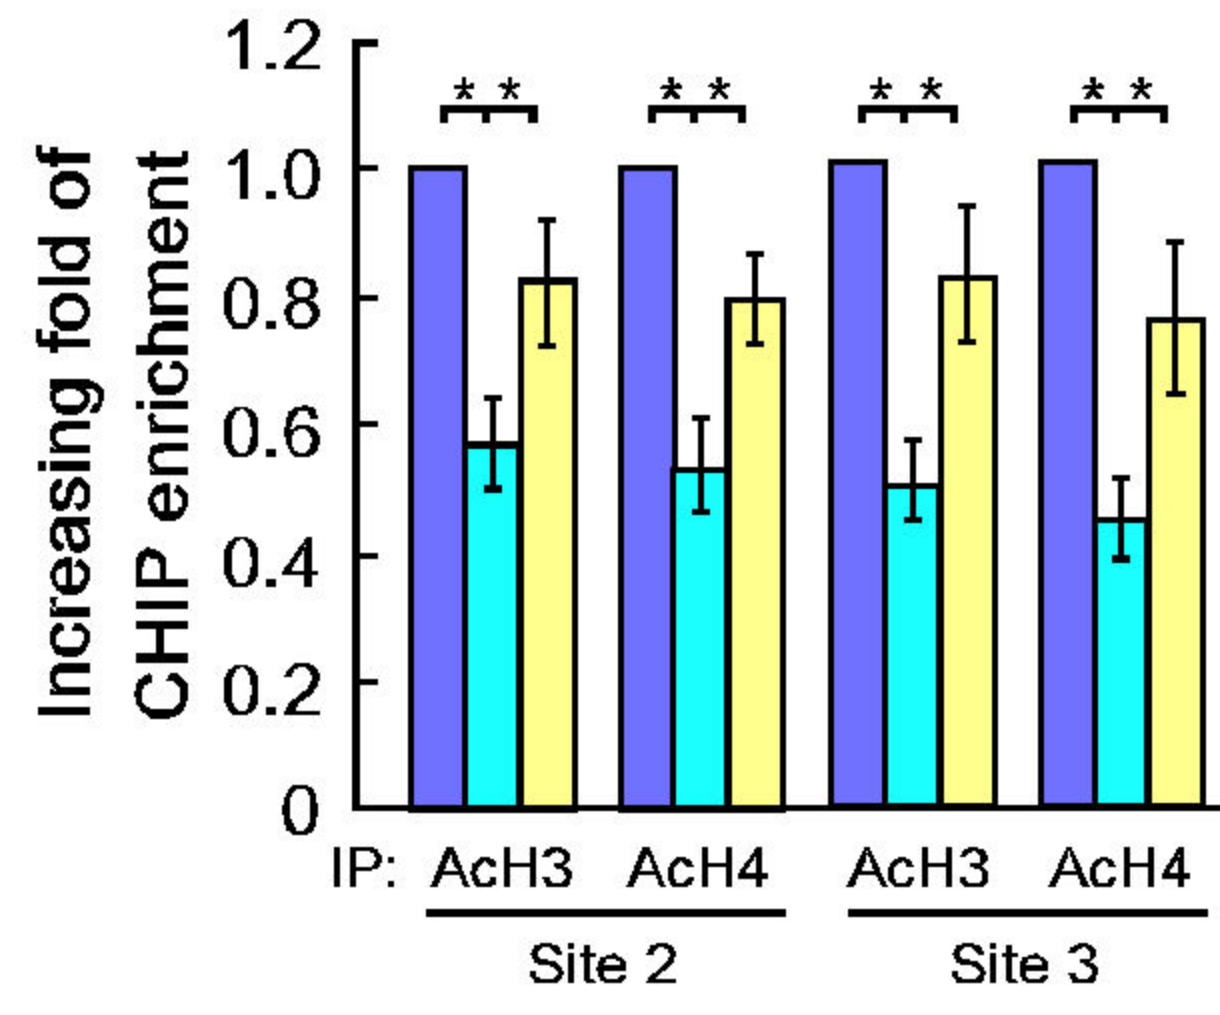

Supplement: MCB.00456-16_zmb999101423s2.pdf [file MCB.00456-16_zmb999101423s2.pdf]
