# Supplementary material
Source: PubMed Central journal article supplement (PMC5311247)

# Supplemental Figure 1

A

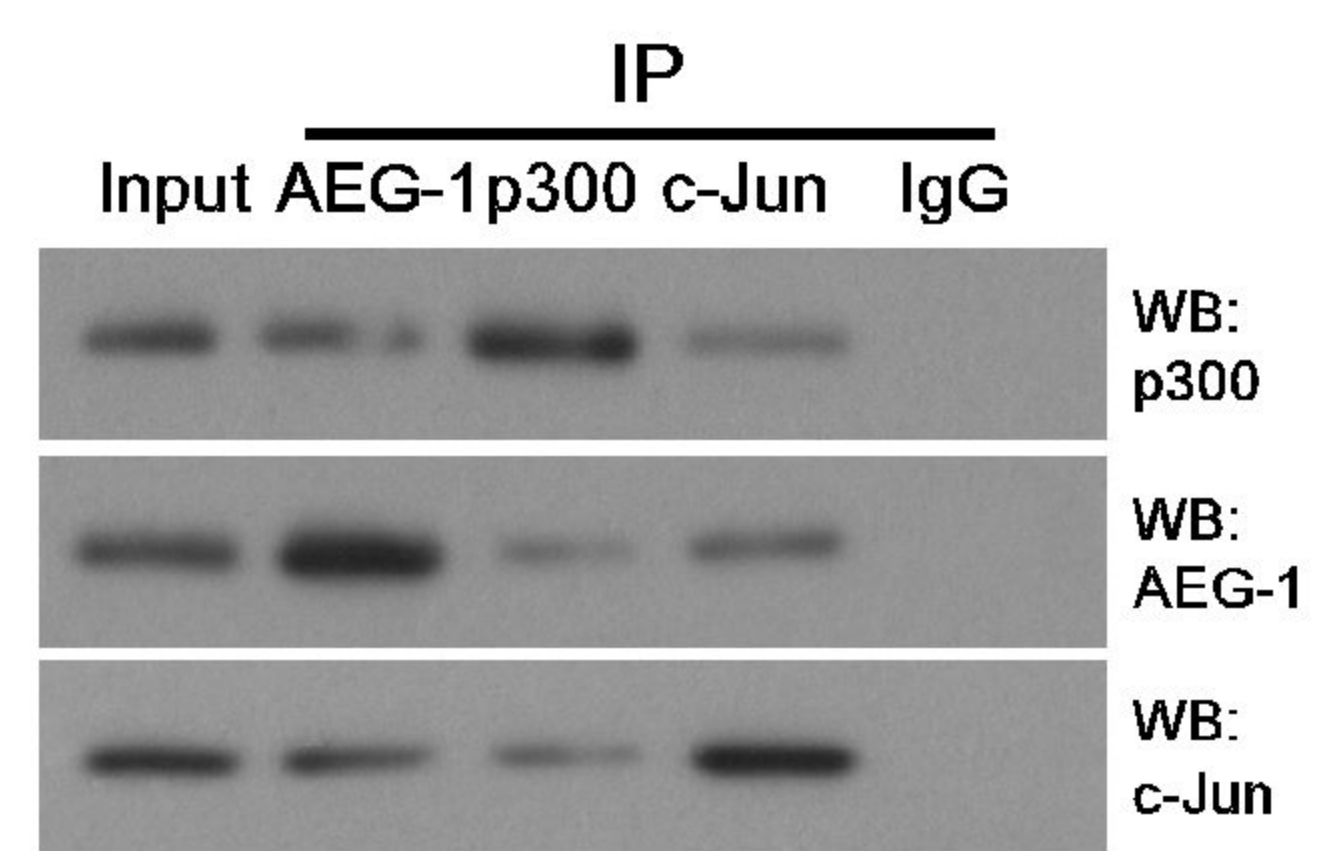

B

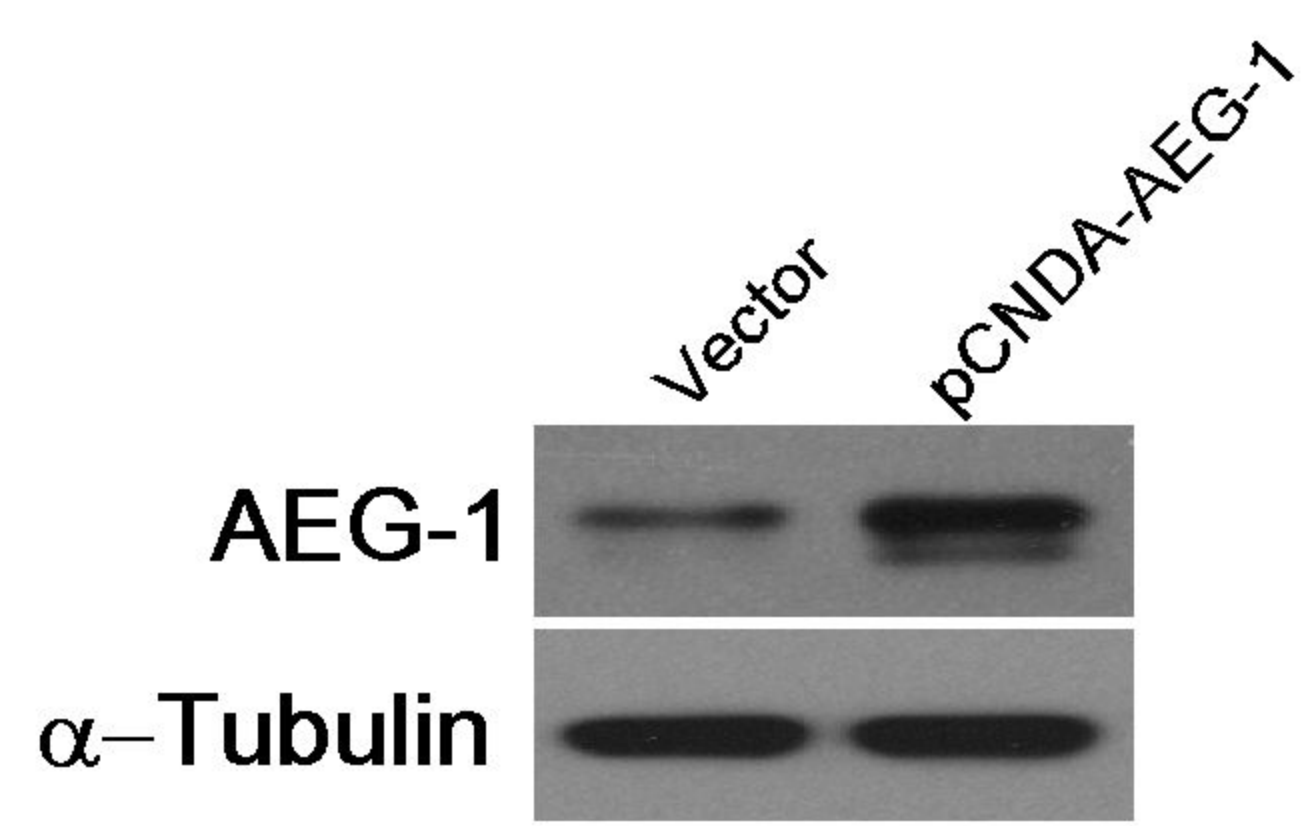

C

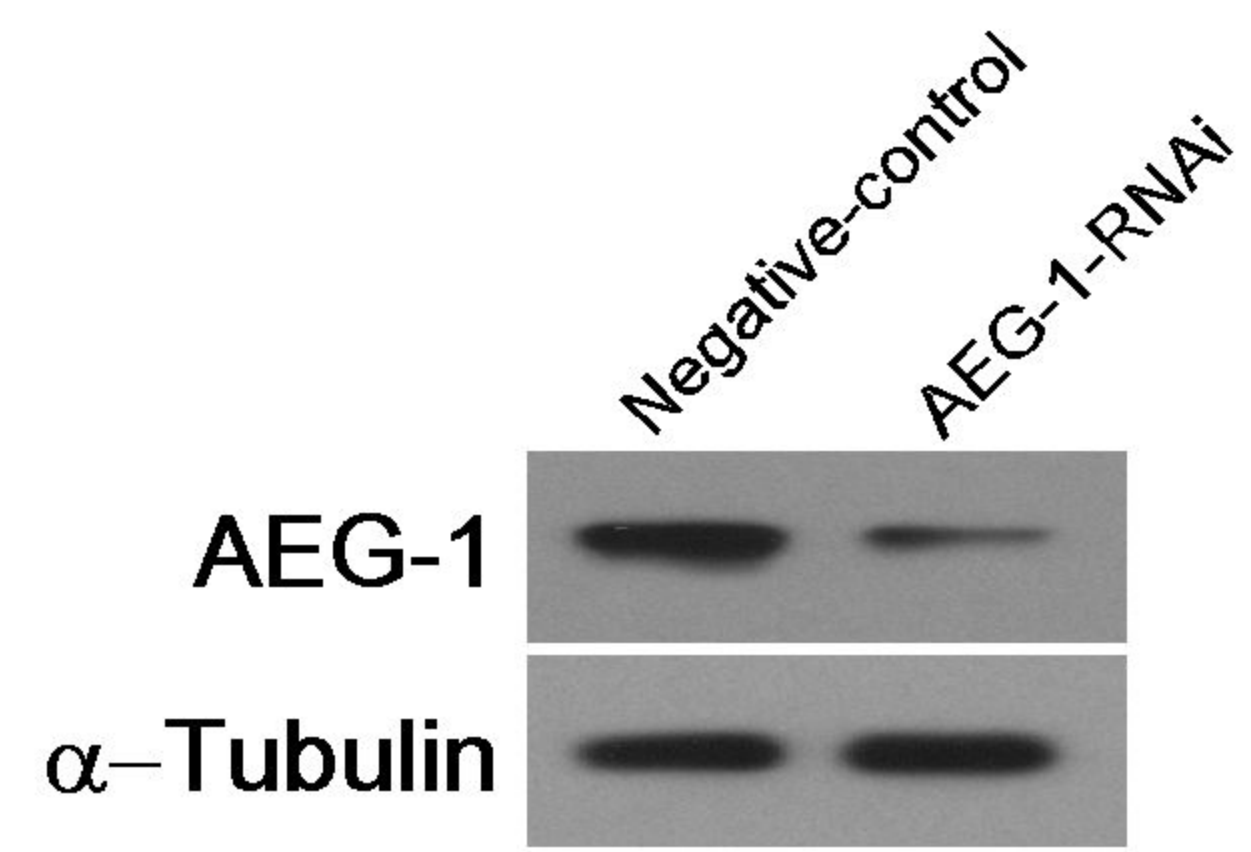

Supplement: MCB.00456-16_zmb999101423s1.pdf [file MCB.00456-16_zmb999101423s1.pdf]
